# Supplementary material
Source: PubMed Central journal article supplement (PMC6029092)
Supplement: AEM.00706-18_zam014188607s1.pdf [file AEM.00706-18_zam014188607s1.pdf]

Marker

*Lactobacillus delbruekii*

*Lactobacillus curvatus*

*Lactobacillus brevis*

*Lactobacillus acidophilus*

*Lactobacillus crispatus*

*Lactobacillus helveticus*

*Lactobacillus ruminis*

*Lactobacillus vaginalis*

*Lactobacillus ingluviei*

*Lactobacillus plantarum*

*Lactobacillus pontis*

*Lactobacillus amylovorus*

*Lactobacillus fermentum*

*Lactobacillus rhamnosus*

*Lactobacillus salivarius*

*Lactobacillus buchneri*

*Lactobacillus alimentarius*

*Lactobacillus collinoideus*

*Lactobacillus fructivorans*

Marker

*Lactobacillus perolens*

*Lactobacillus rossiae*

*Lactobacillus manihotivorans*

*Lactobacillus coryneformis*

*Lactobacillus apinorum*

*Lactobacillus algidus*

*Lactobacillus composti*

*Lactobacillus mellifer*

*Lactobacillus dextrinicus*

*Lactobacillus floricola*

*Lactobacillus selangorensis*

*Lactobacillus amylophilus*

Marker

*Bifidobacterium bifidum*

*Bacteroides thetaiotaomicron*

*Collinsella intestinalis*

*Prevotella copri*

*Escherichia coli*

*Blautia coccoides*

*Faecalibacterium prausnitzii*

*Methanobrevibacter smithii*

*Klebsiella pneumoniae*

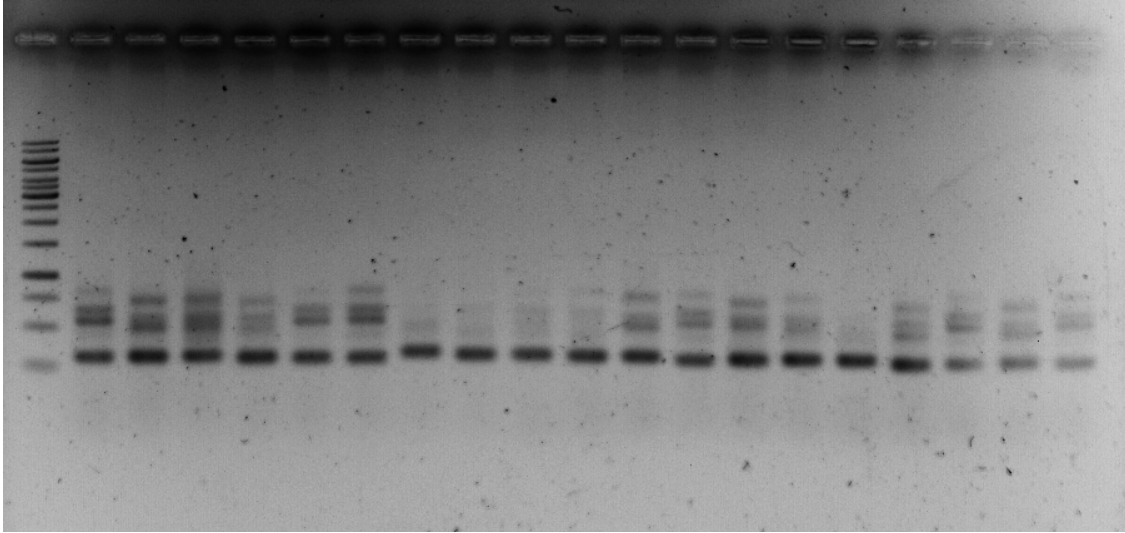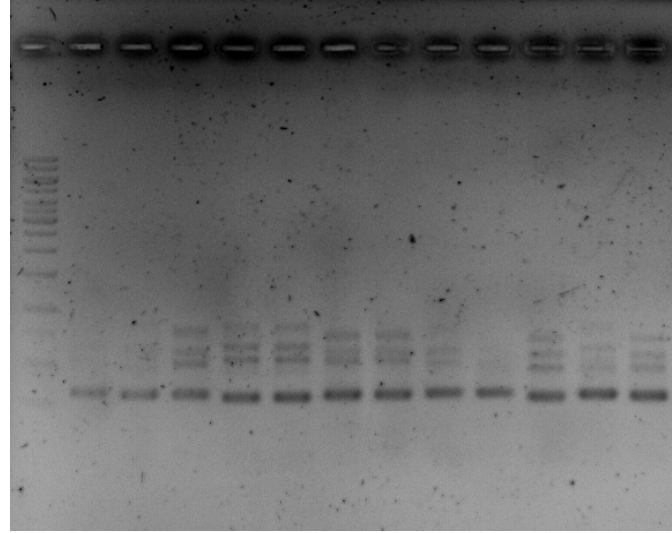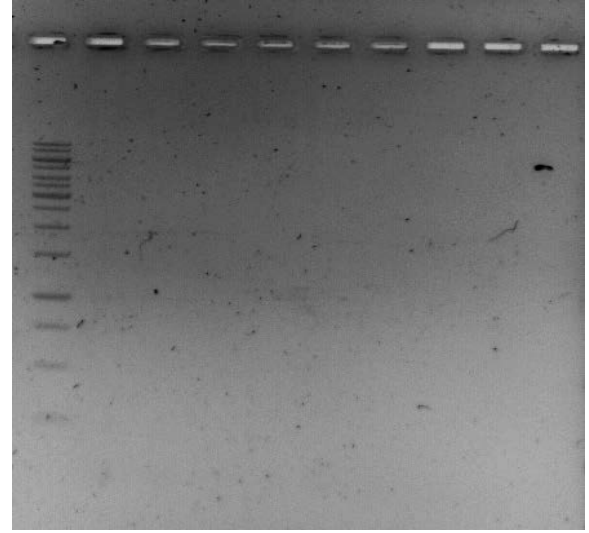

**Supplementary Figure 1:** *In vitro* validation of the primer pair Probio-lac\_Uni/Probio-lac\_Rev. The primer pair Probio-lac\_Uni/Probio-lac\_Rev was used for PCR amplification of DNA extracted from 31 lactobacilli species covering the 23 phylogenetic groups of the *Lactobacillus* genus and from 9 non-lactobacilli taxa.
